# Supplementary material
Source: PubMed Central journal article supplement (PMC2414304)
Supplement: supp_M710606200_Suppl_fig.pdf [file supp_M710606200_Suppl_fig.pdf]

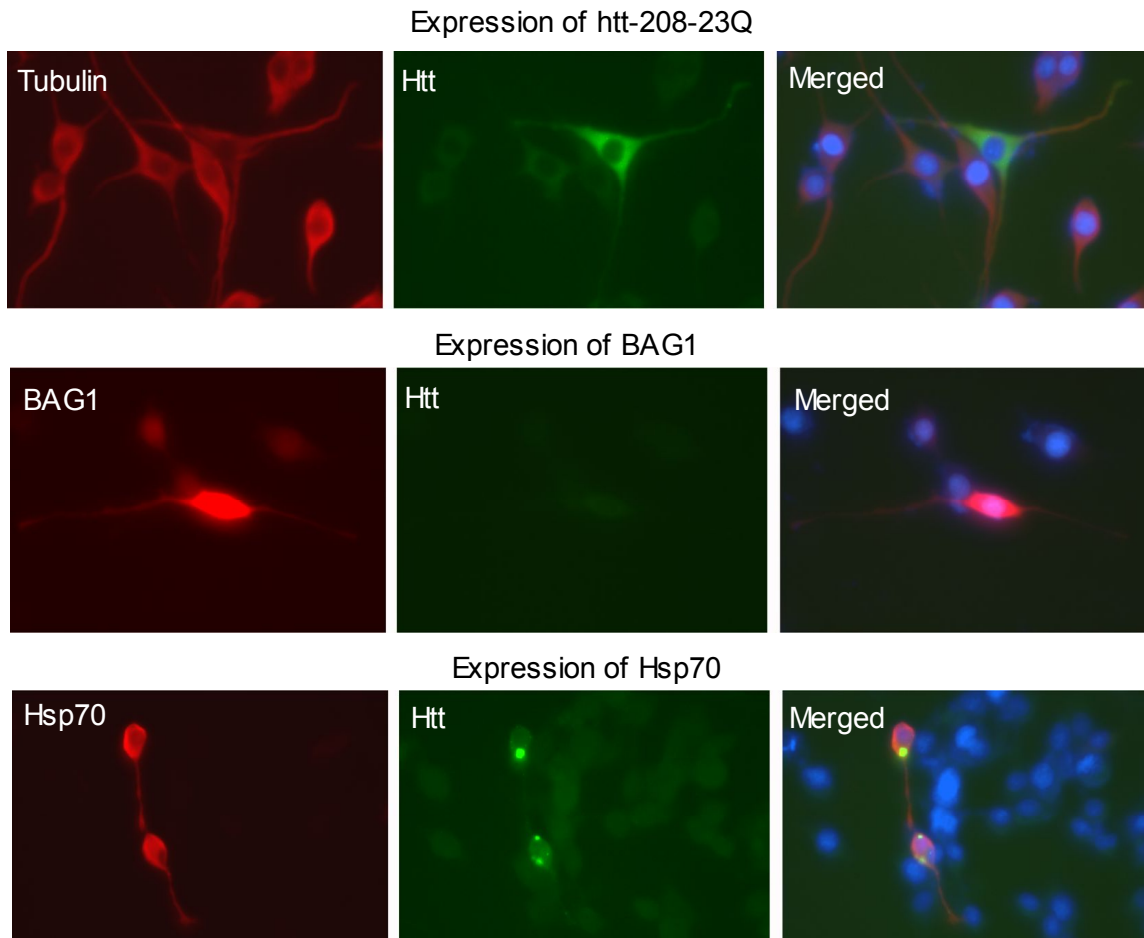

**Supplementary Fig. 1.** PC12 cells were transfected with N208-23Q (upper panel), BAG1 (middle panel), and Hsp70 (lower panel) and then treated with NGF to differentiate. In N208-23Q transfected cells, neurites were revealed by staining of cells with antibody to tubulin. Middle panel shows a PC12 cell that only expressed transfected BAG1. Lower panel images show the co-expression of Hsp70 and mutant htt (N208-120).

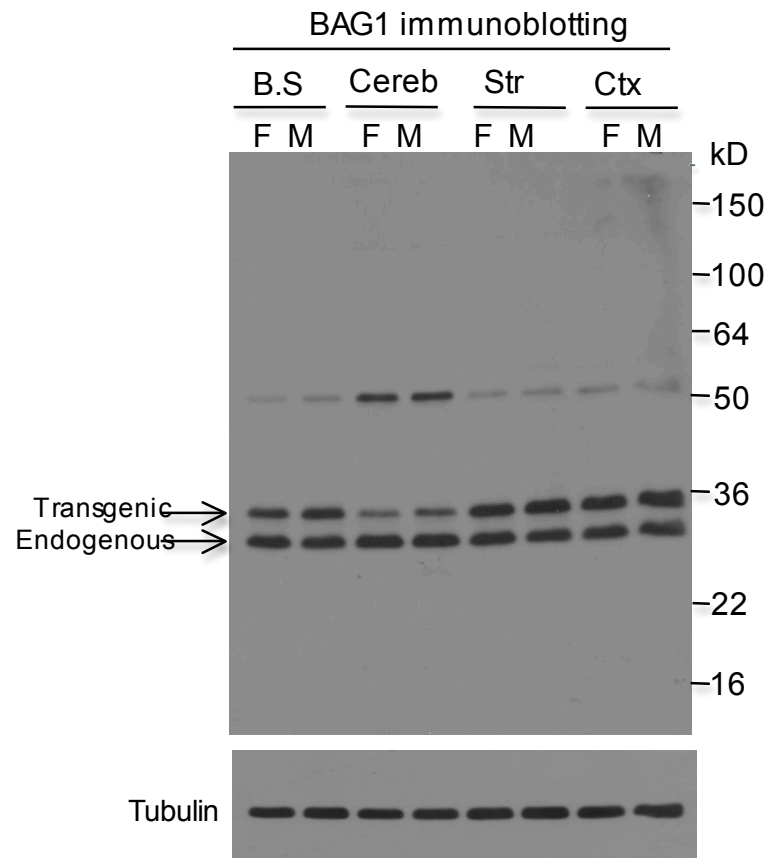

**Supplemental Figure 2** Western blot analysis of the expression of endogenous and transgenic BAG1 in various brain regions of female (F) and male (M) mice. B.S: brain stem, Cereb: cerebellum, Str: straitum, Ctx, cerebral cortex. The blot was probed with antibodies to BAG1 and tubulin.
